# Supplementary material for: Progressive 35S promoter methylation increases rapidly during vegetative development in transgenic Nicotiana attenuata plants
Source: PubMed Central journal article supplement (PMC3716894; doi:10.1186/1471-2229-13-99), 2013-07-09
Supplement: 1471-2229-13-99-S2.pdf [file 1471-2229-13-99-S2.pdf]

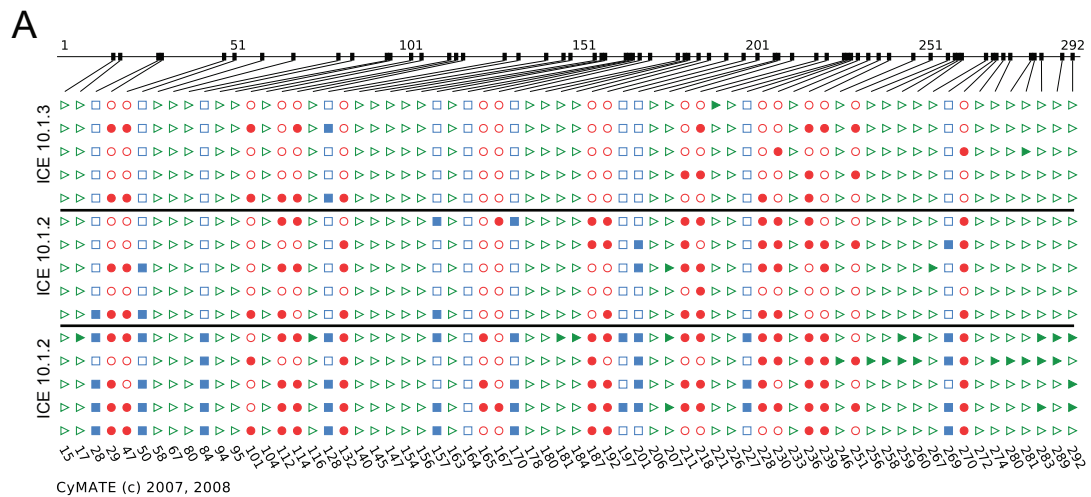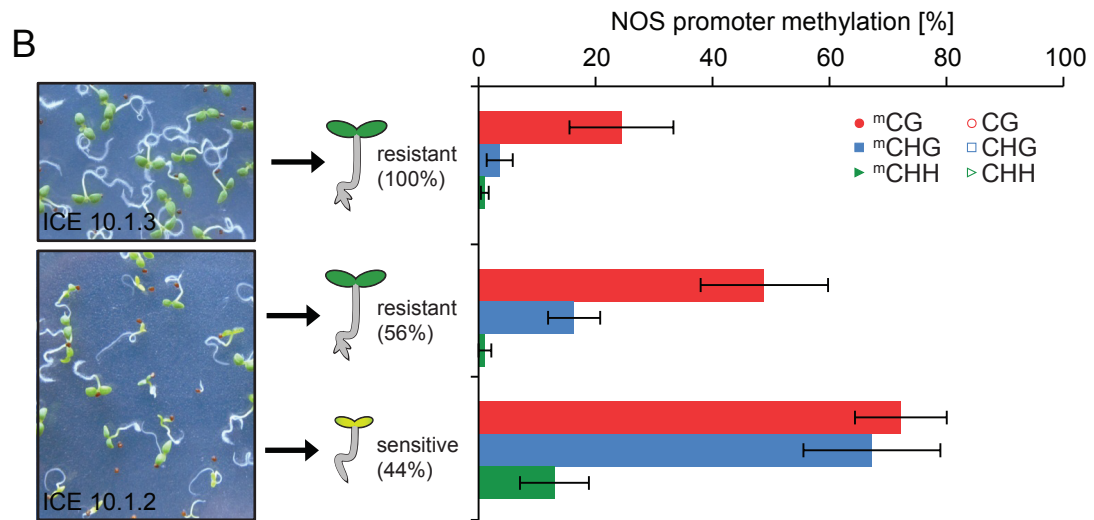

Additional file 2: NOS promoter methylation between sensitive and resistant seedlings of line ICE 10.1
