# Supplementary material for: Progressive 35S promoter methylation increases rapidly during vegetative development in transgenic Nicotiana attenuata plants
Source: PubMed Central journal article supplement (PMC3716894; doi:10.1186/1471-2229-13-99), 2013-07-09
Supplement: 1471-2229-13-99-S3.pdf [file 1471-2229-13-99-S3.pdf]

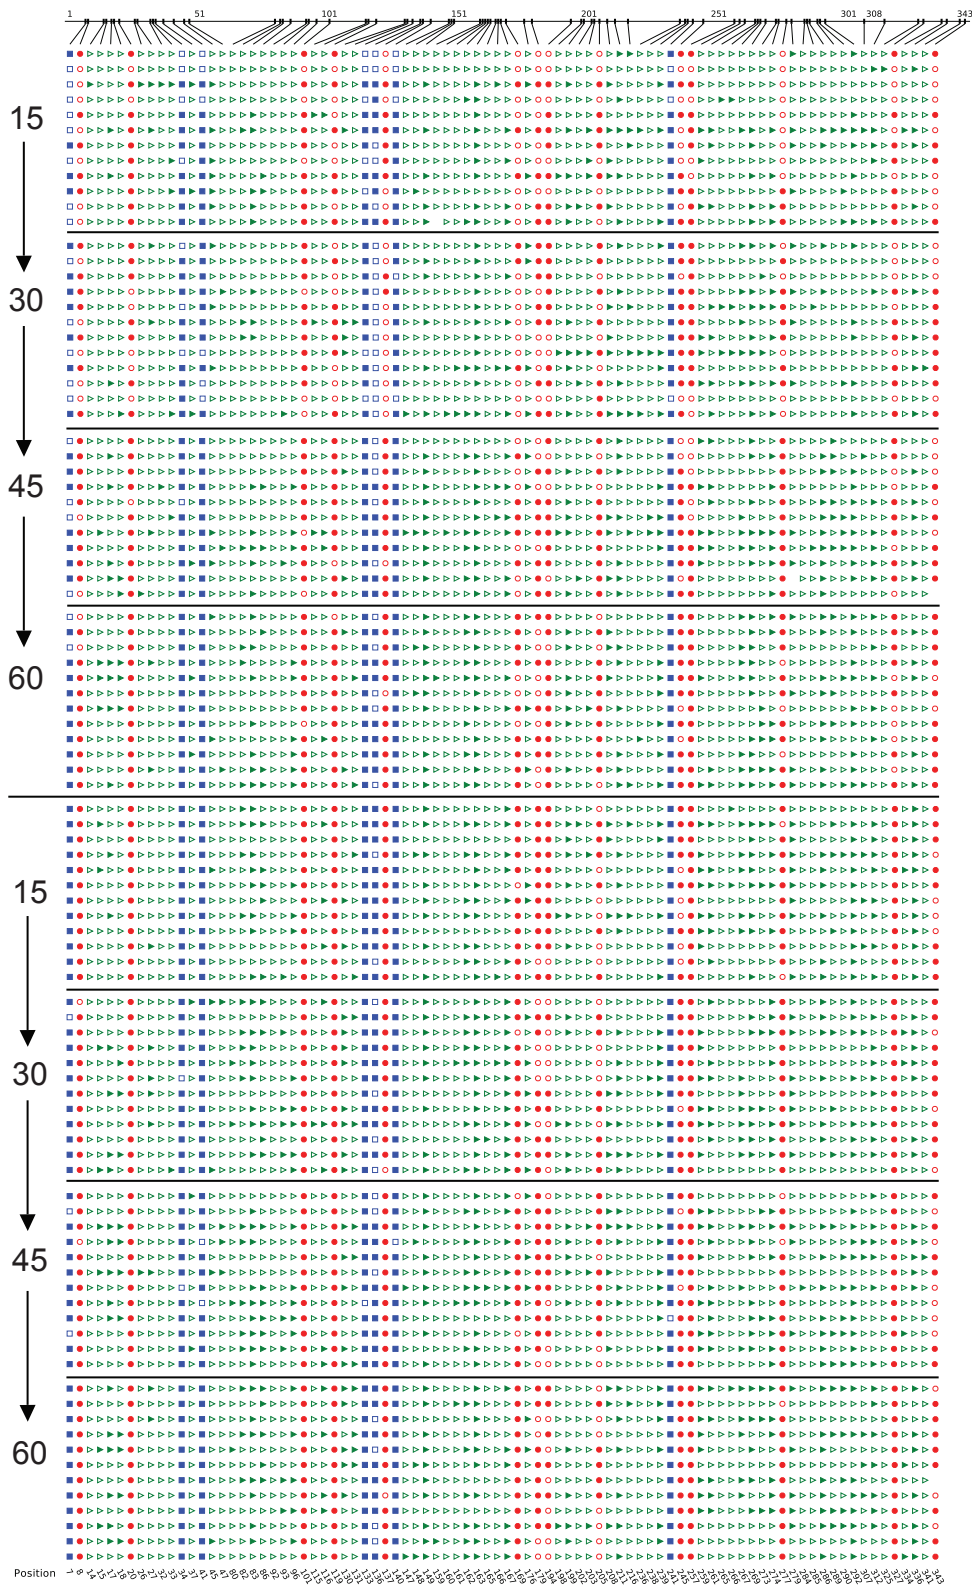

Additional file 3: 35S promoter methylation analysis of individual clones from tissue harvested 15, 30, 45 and 60 days post germination of line ICE 4.4 ( $T_2$ ) and ICE 4.4.1 ( $T_3$ ).

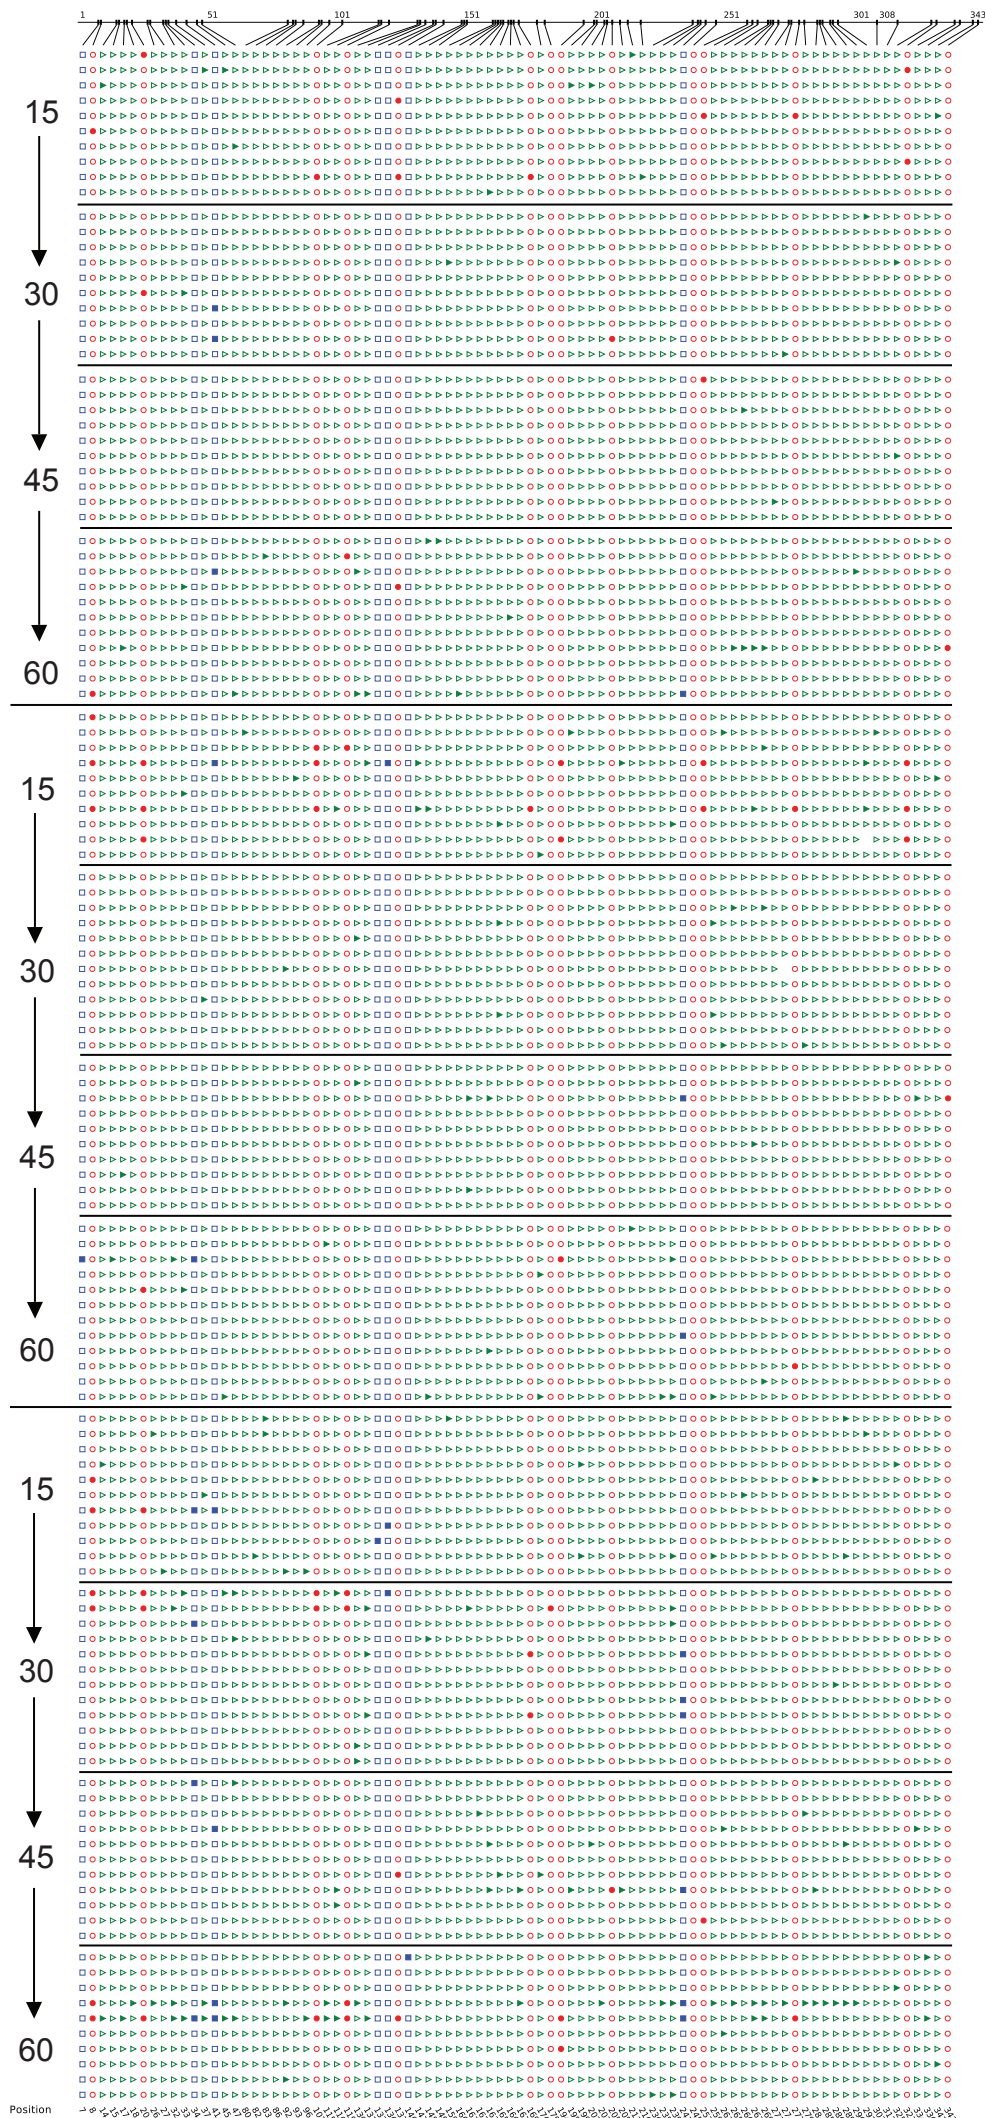

Additional file 3: 35S promoter methylation analysis of individual clones from tissue harvested 15, 30, 45 and 60 days post germination of line ICE 1.1 ( $T_2$ ), ICE 1.1.1 ( $T_3$ ) and ICE 1.1.1.1 ( $T_4$ ).

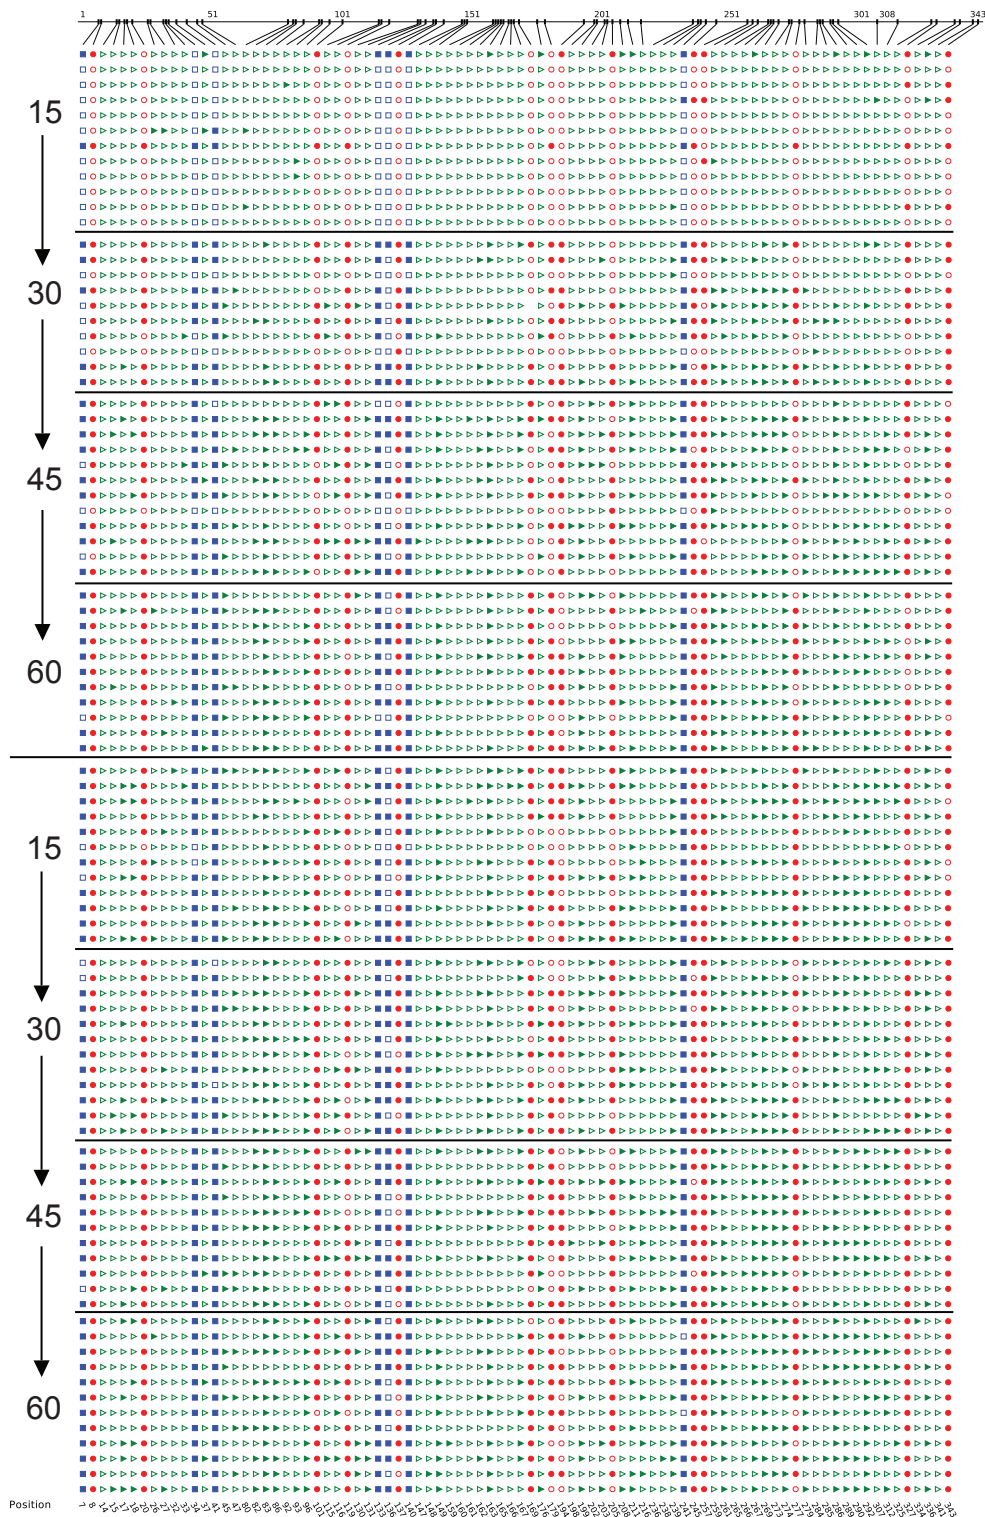

Additional file 3: 35S promoter methylation analysis of individual clones from tissue harvested 15, 30, 45 and 60 days post germination of line PNA 1.2 ( $T_2$ ) and PNA 1.2.1 ( $T_3$ ).

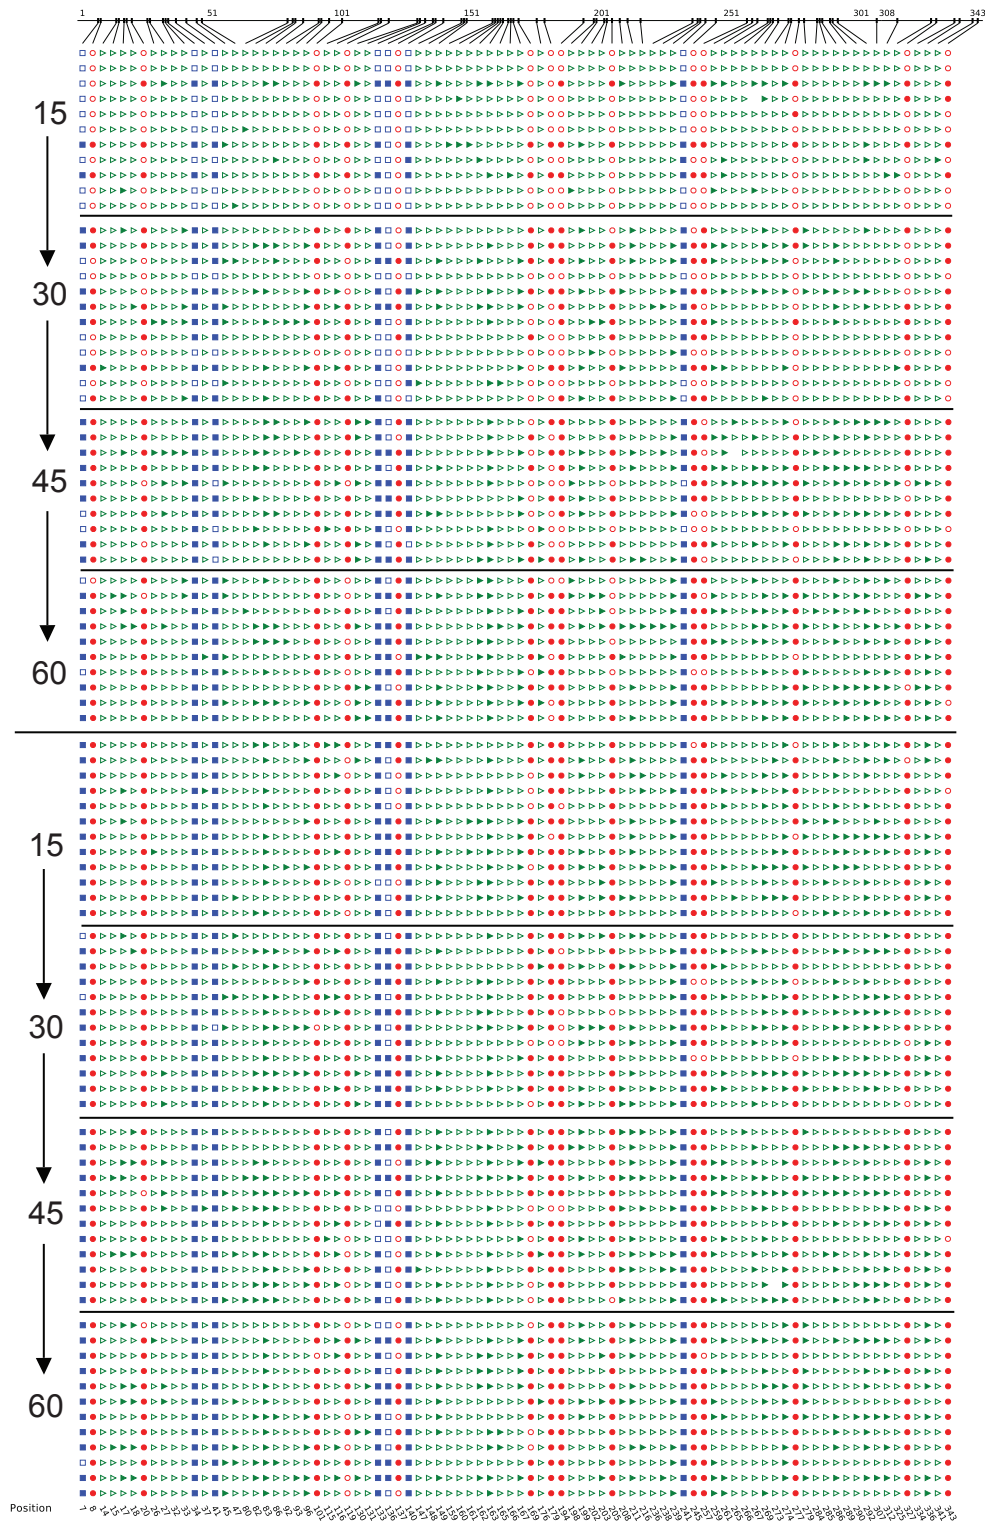

Additional file 3: 35S promoter methylation analysis of individual clones from tissue harvested 15, 30, 45 and 60 days post germination of line PNA 10.1 ( $T_2$ ) and PNA 10.1.1 ( $T_3$ ).

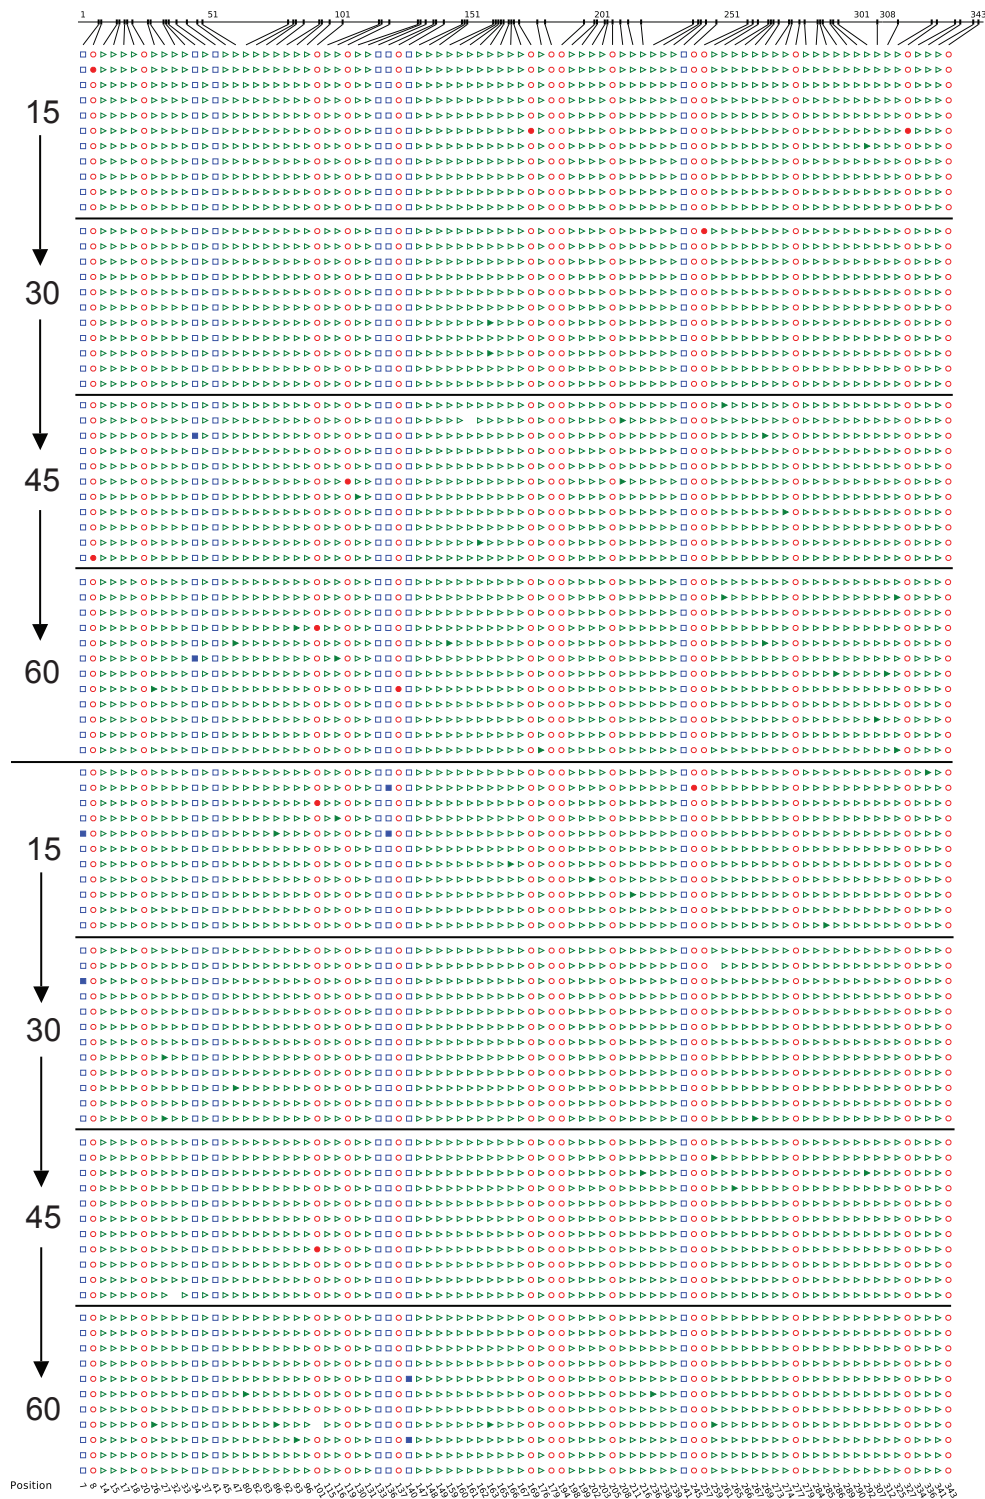

Additional file 3: 35S promoter methylation analysis of individual clones from tissue harvested 15, 30, 45 and 60 days post germination of line PNA 8.6 ( $T_2$ ) and PNA 8.6.1 ( $T_3$ ).
