# Supplementary material for: Progressive 35S promoter methylation increases rapidly during vegetative development in transgenic Nicotiana attenuata plants
Source: PubMed Central journal article supplement (PMC3716894; doi:10.1186/1471-2229-13-99), 2013-07-09
Supplement: 1471-2229-13-99-S5.pdf [file 1471-2229-13-99-S5.pdf]

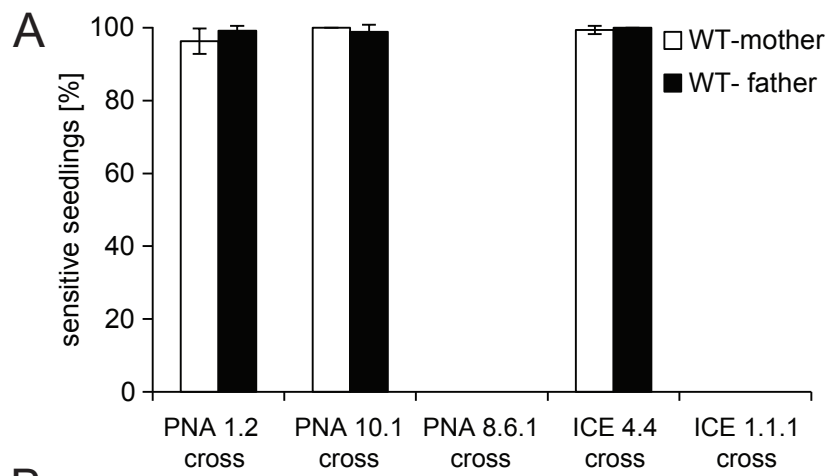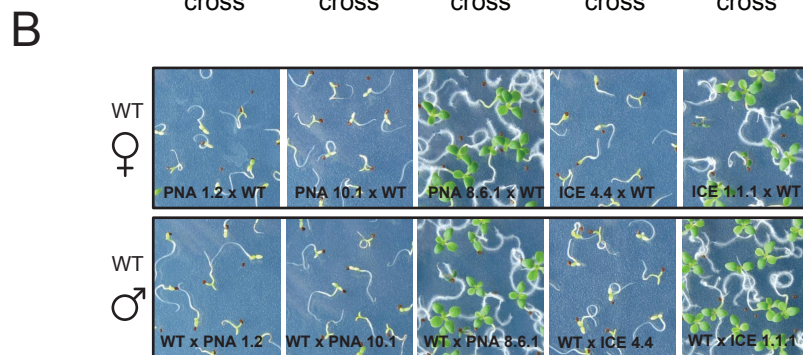

Additional file 5: Inheritance of the silenced allele after reciprocal crossing with wild-type
