# Supplementary material for: Progressive 35S promoter methylation increases rapidly during vegetative development in transgenic Nicotiana attenuata plants
Source: PubMed Central journal article supplement (PMC3716894; doi:10.1186/1471-2229-13-99), 2013-07-09
Supplement: 1471-2229-13-99-S7.pdf [file 1471-2229-13-99-S7.pdf]

# A

T<sub>3</sub> offspring from ICE 4.4 regenerants

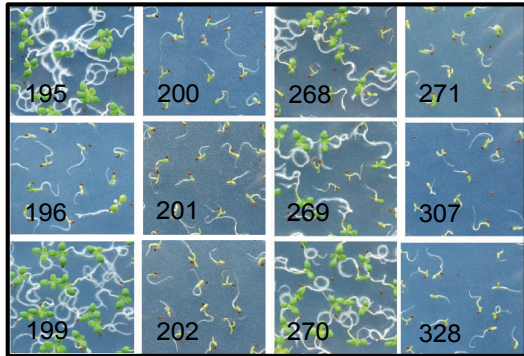

T<sub>3</sub> offspring from PNA 1.2 regenerants

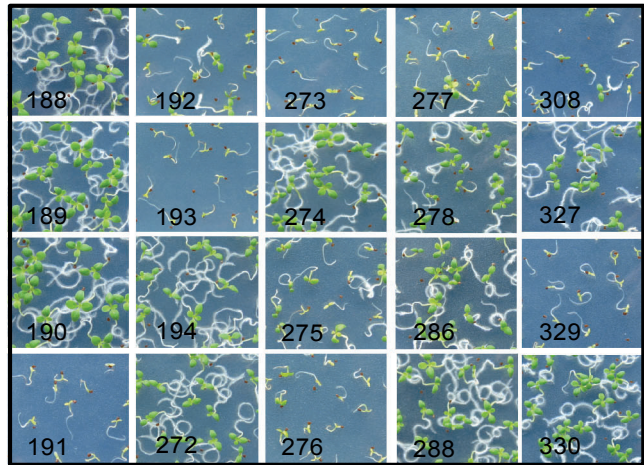

# B

T<sub>4</sub> offspring from ICE 4.4 regenerants

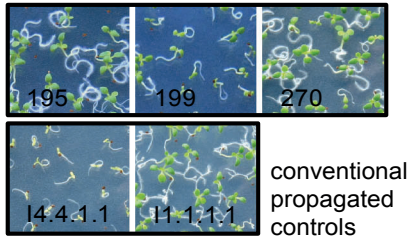

conventional propagated controls

T<sub>4</sub> offspring from PNA 1.2 regenerants

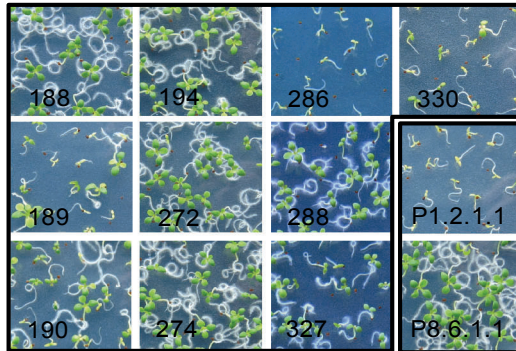

conventional propagated controls

Additional file 7: Phenotypes after secondary regeneration
